# Supplementary material for: Topologically enabled optical nanomotors
Source: PubMed Central journal article supplement — Sci Adv. 2017 Jun 30;3(6):e1602738. doi: 10.1126/sciadv.1602738 (PMC5493414; doi:10.1126/sciadv.1602738), 2017-06-30
Supplement: 1602738_SM.pdf [file 1602738_SM.pdf]

## Supplementary Materials for **Topologically enabled optical nanomotors**

Ognjen Ilic, Ido Kaminer, Bo Zhen, Owen D. Miller, Hrvoje Buljan, Marin Soljačić

Published 30 June 2017, *Sci. Adv.* **3**, e1602738 (2017)

DOI: 10.1126/sciadv.1602738

### **This PDF file includes:**

- fig. S1. Vortex annihilation and conservation of topological charge.
- fig. S2. Vortex annihilation and conservation of topological charge.
- fig. S3. Attractor map for a larger particle/air as the ambient medium.

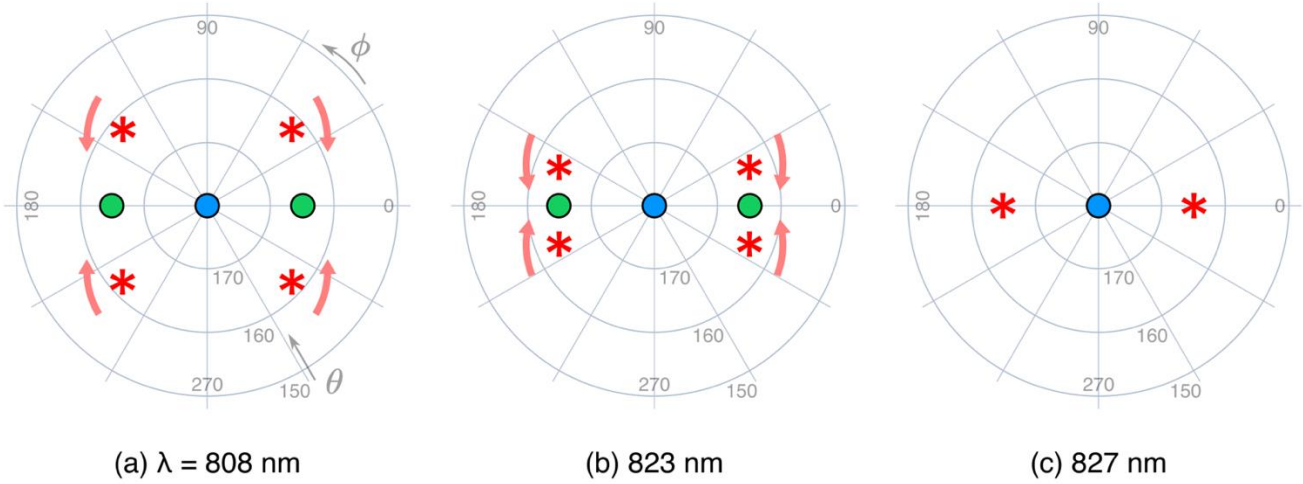

**fig. S1. Vortex annihilation and conservation of topological charge.** An example of merging of two -1 charges (red stars) and a +1 charge (green circle) from Fig. 4,  $b_1 \rightarrow b_2$ . The view is from the  $\theta = 0^\circ, \phi = 180^\circ$  pole, for closely separated wavelengths (a) 808 nm, (b) 823nm, (c) 827nm. In contrast to Fig. 4, which shows a reduced coordinate space ( $\phi \in [0^\circ, 90^\circ]$ ), here we visualize the entire azimuthal range  $\phi \in [0^\circ, 360^\circ]$ .

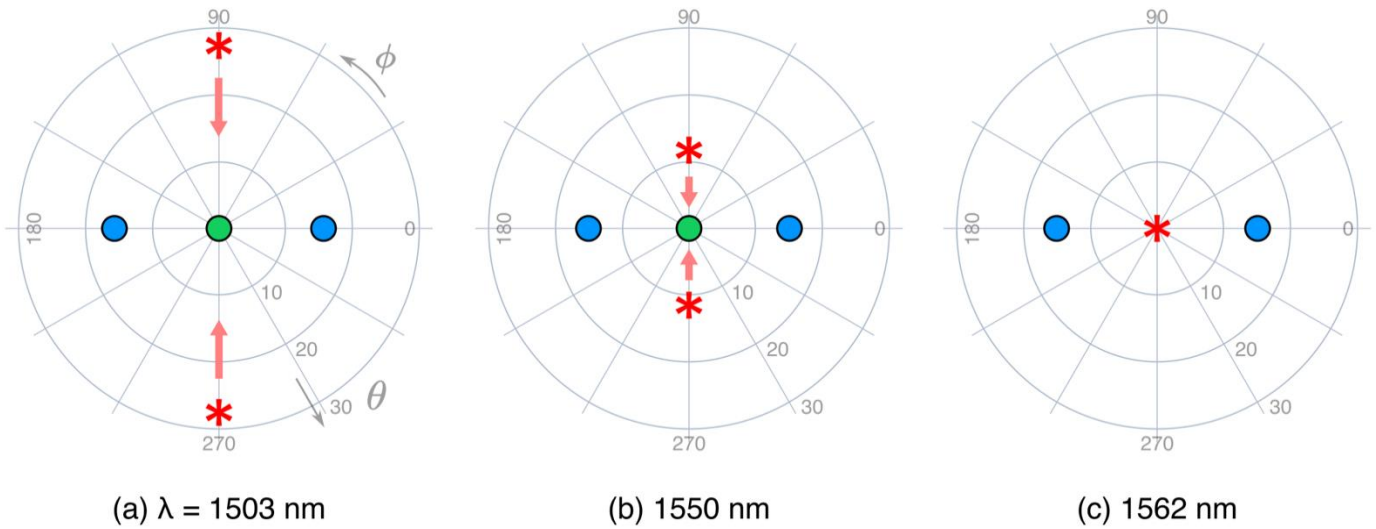

**fig. S2. Vortex annihilation and conservation of topological charge.** An example of merging of two -1 charges (red charges) and a +1 charge (green circle) from Fig. 4,  $4c_1$ . The view is from the  $\theta = 0^\circ, \phi = 0^\circ$  pole, for closely separated wavelengths (a) 1503 nm, (b) 1550 nm, (c) 1562nm. In contrast to Fig. 4, which shows a reduced coordinate space ( $\phi \in [0^\circ, 90^\circ]$ ), here we visualize the entire azimuthal range  $\phi \in [0^\circ, 360^\circ]$ .

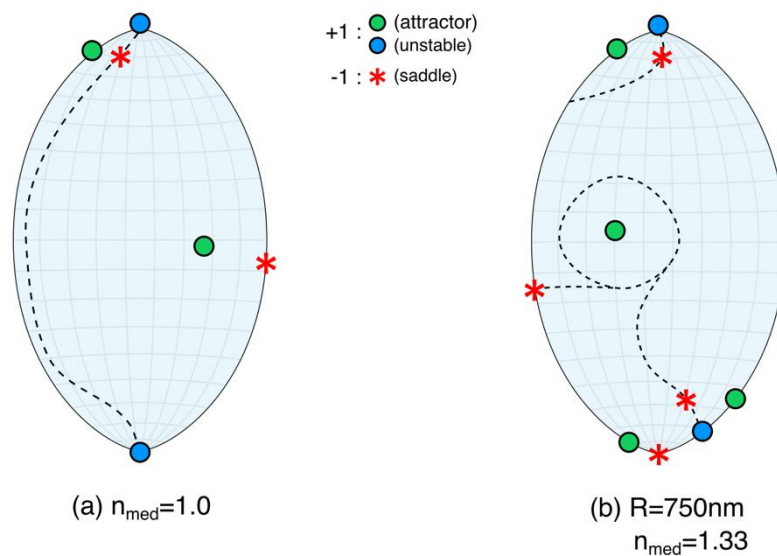

**fig. S3. Attractor map for a larger particle/air as the ambient medium.** Attractor map for the case of the ambient medium with refractive index  $n_{med}=1.0$  (a), and a case of a larger particle ( $R=750\text{ nm}$ ) in the ambient medium of  $n_{med}=1.33$  (b). In both cases,  $\lambda=1064\text{ nm}$ .
